# Supplementary material for: Haplotype-resolved genome assembly provides insights into evolutionary history of the tea plant Camellia sinensis
Source: PubMed Central journal article supplement (PMC8346365; doi:10.1038/s41588-021-00895-y), 2021-07-15
Supplement: 41588_2021_895_MOESM1_ESM.pdf [file 41588_2021_895_MOESM1_ESM.pdf]

---

**Supplementary information**

---

**Haplotype-resolved genome assembly  
provides insights into evolutionary history  
of the tea plant *Camellia sinensis***

---

In the format provided by the  
authors and unedited

## Haplotype-resolved genome assembly provides insights into evolutionary history of the tea plant *Camellia sinensis*

Xingtian Zhang<sup>1,2,†,\*</sup>, Shuai Chen<sup>1,3,4,†</sup>, Longqing Shi<sup>1,3,5,†</sup>, Daping Gong<sup>6,†</sup>, Shengcheng Zhang<sup>4</sup>, Qian Zhao<sup>1,5</sup>, Dongliang Zhan<sup>7</sup>, Liette Vasseur<sup>1,5,8</sup>, Yibin Wang<sup>4</sup>, Jiaxin Yu<sup>4</sup>, Zhenyang Liao<sup>4</sup>, Xindan Xu<sup>4</sup>, Rui Qi<sup>4</sup>, Wenling Wang<sup>4</sup>, Yunran Ma<sup>4</sup>, Pengjie Wang<sup>9</sup>, Naixing Ye<sup>9</sup>, Dongna Ma<sup>1</sup>, Yan Shi<sup>1</sup>, Haifeng Wang<sup>1</sup>, Xiaokai Ma<sup>4</sup>, Xiangrui Kong<sup>10</sup>, Jing Lin<sup>4</sup>, Liufeng Wei<sup>1</sup>, Yaying Ma<sup>4</sup>, Ruoyu Li<sup>4</sup>, Guiping Hu<sup>1,11</sup>, Haifang He<sup>1</sup>, Lin Zhang<sup>12</sup>, Ray Ming<sup>13</sup>, Gang Wang<sup>14</sup>, Haibao Tang<sup>4,\*</sup>, Minsheng You<sup>1,5,\*</sup>

<sup>1</sup>State Key Laboratory of Ecological Pest Control for Fujian and Taiwan Crops, Institute of Applied Ecology, College of Plant Protection, Fujian Agriculture and Forestry University, Fuzhou 350002, China

<sup>2</sup>Shenzhen Branch, Guangdong Laboratory for Lingnan Modern Agriculture, Genome Analysis Laboratory of the Ministry of Agriculture, Agricultural Genomics Institute at Shenzhen, Chinese Academy of Agricultural Sciences, Shenzhen, 518120, China

<sup>3</sup>Institute of Rice, Fujian Academy of Agricultural Sciences, Cangshan, Fuzhou 350018, China

<sup>4</sup>Center for Genomics and Biotechnology, Fujian Provincial Key Laboratory of Haixia Applied Plant Systems Biology, Key Laboratory of Genetics, Fujian Agriculture and Forestry University, Fuzhou 350002, China

<sup>5</sup>Joint International Research Laboratory of Ecological Pest Control, Ministry of Education, Fuzhou 350002, China

<sup>6</sup>Tobacco Research Institute of Chinese Academy of Agricultural Sciences, Qingdao, 266101, China

<sup>7</sup>Hangzhou Kaitai Biotech Co. Ltd, Hangzhou, 310000, China

<sup>8</sup>Department of Biological Sciences, Brock University, 1812 Sir Isaac Brock Way, St. Catharines, ON L2S 3A1, Canada (ORCID #0000-0001-7289-2675)

<sup>9</sup>Key Laboratory of Tea Science, College of Horticulture, Fujian Agriculture and Forestry University, Fuzhou 350002, China

<sup>10</sup>Tea research institute, Fujian Academy of Agricultural Sciences, No. 104, Pudang Road, Jinan District, Fuzhou 350003, China

<sup>11</sup>Jiangxi Sericulture and Tea Research Institute, Nanchang County, Nanchang, 330202 China

<sup>12</sup>Key Laboratory of Cultivation and Protection for Non-Wood Forest Trees, Ministry of Education, Central South University of Forestry and Technology, Changsha 410004, China

<sup>13</sup>Department of Plant Biology, University of Illinois at Urbana-Champaign, Urbana, Illinois 6180, USA

<sup>14</sup>CAS Key Laboratory of Tropical Forest Ecology, Xishuangbanna Tropical Botanical Garden, Chinese Academy of Sciences, Mengla 666303, China

†These authors contributed equally to this work: Xingtian Zhang, Shuai Chen, Longqing Shi, Daping Gong

\*Correspondence, Email: [zhangxt@fafu.edu.cn](mailto:zhangxt@fafu.edu.cn); [msyou@fafu.edu.cn](mailto:msyou@fafu.edu.cn); [tanghaibao@gmail.com](mailto:tanghaibao@gmail.com)

## Supplementary Notes

Supplementary Note 1. Development of Khaper: a kmer-based method to identify and retain representative haplotype for a heterozygous diploid genome

Motivation. Assembly of the heterozygous diploid genome usually involves in removing redundant sequences that are likely originated from allelic contigs. Currently, to our knowledge, there are three strategies that are capable of filtering the redundant contigs from initial contig assemblies, including read-depth (RD), whole genome alignment comparison (WGAC) and Kmer-based. The RD approach, with `purge_haplotigs`<sup>1</sup> as a successful example, investigates the read depth across the initial contigs through mapping raw sequencing data against the reference assembly. For a heterozygous diploid genome, plotting the read depth of these contigs shows a bimodal distribution. Contigs with 1x coverage of sequencing reads indicate that they are haplotype-fused or collapsed assembly of the genome; while, contigs with ~0.5x coverage are haplotype resolved sequences with presence of heterozygous allelic sequences. Therefore, the basic concept of `purge_haplotigs` is to identify and remove alternative allelic contigs based on distribution of read depth. The second strategy to filter heterozygous sequences is based on whole genome alignment comparison, for instance `Pseudohaploid`<sup>2</sup>. This algorithm starts by aligning the genome assembly against itself and pairwise comparison of allelic contigs will lead to long “alignment chains”, indicating redundant homologous regions. One copy within the homologous regions will be retained as a representative haplotype. Both of the two strategies are efficient to solve heterozygous diploid with moderate genome size (2 Gb or less), however, processing large genomes will cost much CPU time and computational resources as alignment of DNA sequences at whole genome level is time-consuming.

Overview of Khaper. The Kmer-based approach showed its efficiency to separate haplotypic sequences even from a large amount of data with hundreds of Gb size. For instance, the recently developed PacBio assembler, `CANU` trio-binning<sup>3</sup>, utilized the Illumina sequencing reads from parental genomes to separate the PacBio long reads into two categories, presenting phased genomic sequences from parents. Additionally, our previous study showed that the Kmer-based approach was able to solve the problem of the highly heterozygous moth genome assembly, by developing a program called `Rabbit`<sup>4</sup>. However, to our knowledge, there is no software that can directly implement the Kmer-based approach to identify allelic contigs from the initial contig assembly. To develop an efficient tool to remove redundant sequences for a large genome such as *C. sinensis*, we propose a program – `Khaper` (Kmer-based haplotype caller; Supplementary Figure 1). `Khaper` implemented the core algorithm from `Rabbit`<sup>4</sup> but with two major differences. `Khaper` is designed for removing redundant sequences from PacBio

assemblies and therefore is able to take either Illumina short reads or PacBio long reads as input. Meanwhile, Khaper retained and re-compiled the redundancy reducing function of Rabbit using C++ with much improved speed, making it broadly applicable to a wide range of genome projects. Khaper starts from a genome survey using 17-mers extracted from Illumina short reads or PacBio long reads by Jellyfish<sup>5</sup>. Investigation of 17-mers reveals a bimodal distribution of Kmer depth. Ideally, the first peak located at 1/2 coverage of the second peak, which represent heterozygous peak and homozygous peak (main peak), respectively. We set  $1.5 \times$  depth of the main peak as a cutoff, and categorized K-mers as “Non-Repeat K-mers” and “Repeat K-mers” as illustrated in Supplementary Figure 1b. Non-Repeat K-mers were tracked back to genome assembly and non-repeat regions were identified for each contig (Supplementary Figure 1c). Further, pairwise comparison between contigs identify primary contigs and redundant sequences if they share a large proportion of Non-Repeat regions (for example 40% in our case). The contigs with longer size are retained as a representative haplotype (Supplementary Figure 1d).

Comparison of Khaper with related programs. We compared Khaper with the other two state-of-art programs, Purge\_haplotigs and Pseudohaploid, which represent RD and WGAC strategies. The data sets we generated for *C. sinensis* de novo assembly was used for program testing, including the CANU initial assembly (5.4 Gb), 58x illumina reads and 114x Pacbio long reads. We tested these data sets on a 28-core Linux server with 128 Gb RAM and allow the tested programs to allocate cores as many as possible. Other parameters were kept as default (see below for command line details). Comparison of these programs reveal that Khaper consumed 1,194 minutes for CPU time and 390 minutes for real time, at least 3.7 and 6.8 times faster than other programs, respectively (Supplementary Table 1). In addition, Khaper generated a reasonable genome assembly (3.06 Gb) after filter redundant sequences, however, assembly sizes in other programs were larger than estimated genome size (3.15 Gb). Meanwhile, we observed that contig N50 in Khaper was the most optimal one among all of the test data. The BUSCO completeness and duplication score in Khaper were comparable with outputs from other programs. Taken together, our newly developed program, Khaper, is fast and efficient to remove redundant sequences for a highly heterozygous diploid species with large genome size.

Command lines of Khaper, Purge\_haplotigs and Pseudohaploid used for testing.

(1) Khaper

```
$ perl Graph.pl pipe -i fq.list -m 2 -k 17 -s 1,3 -d Kmer_17
```

```
$ perl remDup.pl --kbit Kmer_17/02.Uinque_bit/kmer_17.bit --kmer 17 genome.fa  
RemDup 0.4
```

## (2) Purge\_haplotigs for Pacbio subreads

```
$ minimap2 -ax map-pb -t 28 genome.fa pb.merge.fasta.gz --secondary=no --split-prefix  
ref \
```

```
    | samtools sort -@ 20 -m 1G -o aligned.bam -T tmp.ali
```

```
    | samtools sort -@ 12 -m 1G -o aligned.bam -T tmp.ali
```

```
$ purge_haplotigs hist -t 28 -b aligned.bam -g genome.fa
```

```
$ purge_haplotigs cov -i aligned.bam.gencov -l 10 -m 85 -h 130
```

```
$ purge_haplotigs purge -g genome.fa -c coverage_stats.csv -t 28 -o purge
```

## (3) Purge\_haplotigs for Illumina short reads

```
$ bwa index genome.fa
```

```
$ samtools faidx genome.fa
```

```
$ bwa mem -t 28 genome.fa zwt_R1.fq.gz zwt_R2.fq.gz \
```

```
    | /public/home/tanger/software/samtools-1.3/samtools view -hF 256 - \
```

```
    | /public/home/tanger/software/samtools-1.3/samtools sort -@ 12 -m 4G -o aligned.bam  
-T tmp.ali
```

```
$ samtools index aligned.bam
```

```
$ purge_haplotigs hist -t 28 -b aligned.bam -g genome.fa
```

```
$ purge_haplotigs cov -i aligned.bam.gencov -l 10 -m 85 -h 130
```

```
$ purge_haplotigs purge -g genome.fa -c coverage_stats.csv -t 28 -o purge
```

## (4) Pseudohaploid

```
$ ./create_pseudohaploid.sh draft.asm.fasta clean MIN_IDENTITY=90  
MIN_LENGTH=1000 MIN_CONTAIN=93 MAX_CHAIN_GAP=20000
```

## Supplementary Note 2. Genome sequencing and assembly of *C. sinensis* cultivar 'Tieguanyin' Genome

Illumina short reads sequencing. For the genome sequencing of TGY, we collected the leaf samples from the same individual and extracted DNA using Qiagen DNeasy Plant Mini Kit. The DNA library was constructed by selecting fragments with length ranging from 300-500 bp, i.e., insert size 300-500. Afterwards, we sequenced the DNA library on Illumina NovaSeq platform with 150-bp PE (paired-end) model.

Pacbio library construction and Sequencing. The extracted DNA aforementioned was sheared, concentrated and further applied to size-selection by BluePippin system according to the manufacturer's instruction. We constructed ~ 20 kb SMRTbell™ libraries and a total of three Single-Molecule Real-Time (SMRT) cells were sequenced on Pacbio Sequel II platform, generating 359 Gb of subreads (Table 1).

Hi-C library construction and sequencing. The tender leaves collected from the same individual that was used for genome sequencing were subjected to construction of Hi-C

libraries according to the method described before<sup>6</sup>. Mbol was used to digest the cross-linked DNA over-night and biotins were added to the end of fragmented DNA sequences. The chimeric junctions formed by proximity ligation were enriched by extracting biotins and further physically sheared, generating DNA fragments with 500-700 bp size. We sequenced these DNA fragments on Illumina NovaSeq platform with PE model. A total of 1,038 million of 150-bp paired-end reads were produced and the quality was assessed using HiC-Pro program<sup>7</sup>, showing 72.1% of validate Hi-C reads (Supplementary Table 2).

Estimation of TGY genome size. We estimate the nuclear DNA content based on flow cytometry, showing the genome size for a haploid or 1C is 3.15 Gb, close to previously published tea genomes<sup>8-11</sup>.

Contig assembly. We corrected, trimmed and assembled the full PacBio reads using the CANU assembler version 1.9<sup>12</sup> with optimal parameters for polyploid genome phasing (batOptions=-dg 3 -db 3 -dr 1 -ca 500 -cp 50). The initial contig assembly resulted in a 5.4-Gb with a contig N50 of 925.7 kb. This assembly size accounts for 172% of estimated genome size (3.15Gb), indicating a large proportion of redundant sequences present in the draft genome. To remove redundant sequences, we used three programs, including Khaper, Purhaplotigs and Pseudohaploid (Supplementary Note 1). Results are assessed based on genome size, BUSCO scores as well as contig N50. Finally, the 3.06-Gb assembly generated by Khaper was selected for Hi-C scaffolding. The Illumina short reads were further used to polish contig assembly, implemented in the Pilon program<sup>13</sup>. Hi-C scaffolding and chromosome assembly for a monoploid genome. We first mapped the Hi-C reads against the contig assemblies and detected mis-joined assembly by searching for abnormal long-rang contact patterns in 3D-DNA pipeline<sup>14</sup>. The 3D-DNA pipeline performs iterative scaffolding with several rounds of correction. To avoid the assembly errors introduced by the iterative scaffolding steps, we limited only the first round of Hi-C correction in the 3D-DNA pipeline (i.e., only correction of contigs rather than correction of scaffolds) in our improved haplotype-resolved TGY genome assembly. The Hi-C corrected contigs were further suggested to ALLHiC scaffolding<sup>15</sup>, resulting in a chromosome-scale assembly with 15 pseudo-chromosomes anchored. We assessed the accuracy of Hi-C assembly by chromatin contact matrix (Extended Data Fig. 1b).

Haplotype-resolved chromosomal level assembly. The CANU initial contig assembly was used for haplotype-resolved chromosomal level assembly. To rescue collapsed regions, 184 Gb whole genome shotgun reads sequenced by Illumina Nova-seq platform were mapped against the CANU assembly and copy number was calculated for each contig

using a home-make PYTHON script. Ideally, a phased contig (i.e., both of allelic contigs are present in assembly) will have one copy in the draft genome assembly, while a haplotype-fused contig has two copies. The haplotype-fused contigs were duplicated and subject to Hi-C scaffolding along with haplotype phased contigs. The modified contig assembly resulted in 5.80 Gb genome sequences and were linked into 30 phased chromosomes in ALLHiC pipeline with polyploid model. After that, we manually corrected assembly errors, especially chimeric scaffolds, based on synteny analysis between the haplotype-resolved assembly and the monoploid chromosomal level assembly. Finally, a haplotype-resolved chromosomal level of *C. sinensis* cultivar TGY genome was released. Validation of genome assembly. We assessed the assembly completeness based on 1,375 conserved plant genes in BUSCO program<sup>16</sup> with default parameters. BUSCO reported 93.7% and 95.2% of completeness for the monoploid genome and the haplotype-resolved genome, respectively (Table 1 and Supplementary Table 1). In addition, Illumina reads were aligned to the monoploid assembly using BWA<sup>17</sup>, revealing that 99.74% of reads were mappable (Supplementary Table 5), covering 98.6% of TGY genome sequences. These results indicate a high level of assembly completeness and accuracy in our assemblies (Supplementary Table 5). Compared to the recently published two chromosome-scale CSS assemblies, the TGY genome is superior in continuity (contig N50: 1.94 Mb vs. 0.6 Mb for CSS-SCZ and 0.27 Mb for CSS-LJ43) and BUSCO completeness (93.7% vs. 90.6% for CSS-SCZ and 90.0% for CSS-LJ43), though the statistics are slightly lower than the assembly of wild tea plant, CSA-DASZ (a contig N50 of 2.59 Mb and BUSCO completeness of 95.1%; **Supplementary Table 4**). Synteny analysis between the TGY genome with CSS or CSA revealed high consistency and a number of genomic rearrangements were detected (**Extended Data Figs. 2-3**). Assessment using LTR Assembly Index (LAI)<sup>18</sup> revealed more intact LTRs in the TGY genome, qualifying it as a reference genome (**Supplementary Table 4 and Extended Data Fig. 1c**).

## References

1. Roach, M. J., Schmidt, S. A. & Borneman, A. R. Purge Haplotigs: allelic contig reassignment for third-gen diploid genome assemblies. *BMC Bioinformatics* **19**, 460 (2018).
2. Chen, L.-Y. *et al.* The bracteatus pineapple genome and domestication of clonally propagated crops. *Nature Genetics* **51**, 1549–1558 (2019).
3. Koren, S. *et al.* De novo assembly of haplotype-resolved genomes with trio binning.

- Nature Biotechnology* **36**, 1174–1182 (2018).
4. You, M. *et al.* A heterozygous moth genome provides insights into herbivory and detoxification. *Nature Genetics* **45**, 220–225 (2013).
  5. Marçais, G. & Kingsford, C. A fast, lock-free approach for efficient parallel counting of occurrences of k-mers. *Bioinformatics* **27**, 764–770 (2011).
  6. Xie, T. *et al.* De novo plant genome assembly based on chromatin interactions: a case study of *Arabidopsis thaliana*. *Mol Plant* **8**, 489–492 (2015).
  7. Servant, N. *et al.* HiC-Pro: an optimized and flexible pipeline for Hi-C data processing. *Genome Biology* **16**, 259 (2015).
  8. Zhang, W. *et al.* Genome assembly of wild tea tree DASZ reveals pedigree and selection history of tea varieties. *Nature Communications* **11**, 3719 (2020).
  9. Xia, E.-H. *et al.* The Tea Tree Genome Provides Insights into Tea Flavor and Independent Evolution of Caffeine Biosynthesis. *Molecular Plant* **10**, 866–877 (2017).
  10. Wang, X. *et al.* Population sequencing enhances understanding of tea plant evolution. *Nature Communications* **11**, 4447 (2020).
  11. Wei, C. *et al.* Draft genome sequence of *Camellia sinensis* var. *sinensis* provides insights into the evolution of the tea genome and tea quality. *Proceedings of the National Academy of Sciences* **115**, E4151–E4158 (2018).
  12. Koren, S. *et al.* Canu: scalable and accurate long-read assembly via adaptive k-mer weighting and repeat separation. *Genome Research* **27**, 722–736 (2017).
  13. Walker, B. J. *et al.* Pilon: An integrated tool for comprehensive microbial variant detection and genome assembly improvement. *PLoS ONE* **9**, e112963 (2014).
  14. Dudchenko, O. *et al.* De novo assembly of the *Aedes aegypti* genome using Hi-C yields chromosome-length scaffolds. *Science* **356**, 92–95 (2017).
  15. Zhang, X., Zhang, S., Zhao, Q., Ming, R. & Tang, H. Assembly of allele-aware, chromosomal-scale autopolyploid genomes based on Hi-C data. *Nature Plants* **5**, (2019).
  16. Simão, F. A., Waterhouse, R. M., Ioannidis, P., Kriventseva, E. v & Zdobnov, E. M. BUSCO: assessing genome assembly and annotation completeness with single-copy orthologs. *Bioinformatics* **31**, 3210–3212 (2015).
  17. Li, H. & Durbin, R. Fast and accurate short read alignment with Burrows-Wheeler transform. *Bioinformatics* **25**, 1754–1760 (2009).
  18. Ou, S., Chen, J. & Jiang, N. Assessing genome assembly quality using the LTR Assembly Index (LAI). *Nucleic Acids Res.* (2018) doi:10.1093/nar/gky730.



Supplementary Table 1. Comparison of our newly developed algorithm (Khaper) with the programs of Purge\_haplotigs and Pseudohaploid

| Strategy               | Input<br>(canu<br>assembly) | assembly<br>initial | Khaper<br>K-mer                             | Purge_haplotigs<br>Read depth              | Pseudohaploid<br>Whole genome alignment  |                |
|------------------------|-----------------------------|---------------------|---------------------------------------------|--------------------------------------------|------------------------------------------|----------------|
| Data set               | N.A.                        |                     | Draft<br>assembly/Illumina<br>reads (58 × ) | Draft<br>assembly/Pacbio<br>reads (114 × ) | Draft assembly/Illumina<br>reads (58 × ) | Draft assembly |
| Real Time (min)        | N.A.                        |                     | 390                                         | 1780                                       | 1452                                     | 7049           |
| CPU Time (min)         | N.A.                        |                     | 1194                                        | 40441                                      | 29016                                    | 8117           |
| Assembly size (Gb)     | 5.41                        |                     | 3.06                                        | 3.26                                       | 3.27                                     | 4.99           |
| BUSCO completeness (%) | 95.6                        |                     | 93.7                                        | 95.2                                       | 95.5                                     | 95.7           |
| BUSCO duplication (%)  | 70.0                        |                     | 10.1                                        | 9.6                                        | 22.8                                     | 60.0           |
| Contig N50 (Mb)        | 0.93                        |                     | 1.94                                        | 1.78                                       | 1.77                                     | 1.07           |
| No. of contigs         | 17,662                      |                     | 3699                                        | 4941                                       | 5156                                     | 11803          |

N.A. indicates Not Available.

Supplementary Table 2. Statistics of Hi-C mapping of the 'TGY' genome

| Statistics of mapping                   |            |
|-----------------------------------------|------------|
| Clean Paired-end Reads                  | 1038167101 |
| Unmapped Paired-end Reads               | 28846838   |
| Unmapped Paired-end Reads Rate (%)      | 2.777      |
| Paired-end Reads with Singleton         | 173880209  |
| Paired-end Reads with Singleton Rate(%) | 16.74      |
| Multi Mapped Paired-end Reads           | 475187581  |
| Multi Mapped Ratio (%)                  | 45.79      |
| Unique Mapped Paired-end Reads          | 360252473  |
| Unique Mapped Ratio (%)                 | 34.693     |
| Statistics of valid reads               |            |
| Unique Mapped Paired-end Reads          | 360252473  |
| Dangling End Paired-end Reads           | 24211205   |
| Dangling End Rate (%)                   | 6.721      |
| Self Circle Paired-end Reads            | 6205678    |
| Self Circle Rate (%)                    | 1.723      |
| Dumped Paired-end Reads                 | 51006791   |
| Dumped Rate (%)                         | 14.159     |
| Interaction Paired-end Reads            | 274949410  |
| Interaction Rate (%)                    | 76.321     |
| Lib Valid Paired-end Reads              | 198170721  |
| Lib Valid Rate (%)                      | 72.1       |
| Lib Dup (%)                             | 27.9       |

Supplementary Table 3. Statistics of chromosomal level monoploid assembly in 'TGY'

| ChrID                                          | No. of contigs | Length (bp) |
|------------------------------------------------|----------------|-------------|
| Chr1                                           | 262            | 260823534   |
| Chr2                                           | 618            | 263612798   |
| Chr3                                           | 245            | 212239356   |
| Chr4                                           | 240            | 229735363   |
| Chr5                                           | 212            | 229482998   |
| Chr6                                           | 276            | 236925330   |
| Chr7                                           | 229            | 214919478   |
| Chr8                                           | 174            | 213467978   |
| Chr9                                           | 188            | 170688365   |
| Chr10                                          | 190            | 200071334   |
| Chr11                                          | 170            | 189546957   |
| Chr12                                          | 241            | 162252815   |
| Chr13                                          | 220            | 167407016   |
| Chr14                                          | 147            | 138816800   |
| Chr15                                          | 139            | 141162172   |
| Total No. of contigs                           |                | 3699        |
| Total length of contigs (Gb)                   |                | 3.06        |
| Total No. of anchored contigs                  |                | 3551        |
| Total length of chromosome level assembly (Mb) |                | 3.03        |
| Anchor rate (%)                                |                | 98.96       |

Supplementary Table 4. Comparison of contig assemblies among five genomes of tea accessions

|                          | CSS (TGY)                  |                       | CSA<br>(Yunkang10) | CSS-SCZ  | CSA-DASZ  | CSS-LJ43 |
|--------------------------|----------------------------|-----------------------|--------------------|----------|-----------|----------|
|                          | Initial contig<br>assembly | Monoploid<br>assembly |                    |          |           |          |
| No. Of contigs           | 17,662                     | 3,699                 | 37,618             | 7,031    | 5,453     | 37,600   |
| Max length (Mb)          | 13.71                      | 13.71                 | 3.5058             | 2.88     | 16.83     | 2.43     |
| Assembly size (Mb)       | 5,410.47                   | 3,062.53              | 3,021.23           | 2,938.18 | 3099      | 3260     |
| Contig N90 (bp)          | 107,813                    | 413,666               | 83,917             | 209,326  | 393,931   | 35,684   |
| Contig N50 (bp)          | 925,696                    | 1,941,180             | 449,457            | 600,461  | 2,589,771 | 271,330  |
| Average (bp)             | 306,333                    | 827,933               | 80,313             | 417,864  | 574,796   | 35,684   |
| Complete BUSCO ratio (%) | 95.4%                      | 93.7%                 | 90.2%              | 90.6%    | 95.1      | 90.0     |
| Raw LAI                  | 10.04                      | 8.48                  | 1.70               | 8.63     | 8.29      | 7.35     |
| LAI                      | 10.00                      | 10.17                 | 2.05               | 8.14     | 10.08     | 9.58     |

Supplementary Table 5. Assessment of monoploid genome consistency based on Illumina reads

| Item                                     | Statistic   |
|------------------------------------------|-------------|
| Number of reads                          | 612,510,318 |
| Data size (Gb)                           | 91.87       |
| Mapped bases (Gb)                        | 91.63       |
| Mapping rate (%)                         | 99.74       |
| Genome Length (Mbp)                      | 3062.53     |
| Mean Depth                               | 53.61       |
| Coverage Rate (%)                        | 98.6        |
| Regions with low coverage (< 5 reads)    | 90,141,266  |
| Percentage with low coverage (< 5 reads) | 0.0508%     |
| Number of homozygous variants            | 169,477     |
| Percentage of homozygous variants        | 0.051%      |

Supplementary Table 6. BUSCO analysis of annotation completeness in TGY monoploid genome

| Description                        | C. sinensis cultivar 'TGY' |                |
|------------------------------------|----------------------------|----------------|
|                                    | Number                     | Percentage (%) |
| Complete BUSCOs(C)                 | 1266                       | 92.1           |
| Complete and single-copy BUSCOs(S) | 1151                       | 83.7           |
| Complete and duplicated BUSCOs(D)  | 115                        | 8.4            |
| Fragmented BUSCOs(F)               | 31                         | 2.3            |
| Missing BUSCOs(M)                  | 78                         | 5.6            |
| Total BUSCO groups searched        | 1375                       | 100.0          |

Supplementary Table 7. TE annotation of three tea genomes

|                           | CSA-YK10   |             | CSS(Shuchazao) |             | CSS(TGY)   |             |
|---------------------------|------------|-------------|----------------|-------------|------------|-------------|
|                           | Length(Mb) | % of genome | Length(Mb)     | % of genome | Length(Mb) | % of genome |
| Total repeat fraction     | 1911.91    | 63.28       | 2071.55        | 65.94       | 2391.46    | 78.15       |
| Class I: Retroelement     | 1685.23    | 55.78       | 1764.84        | 56.18       | 1957.15    | 63.96       |
| LTR                       |            |             |                |             |            |             |
| Retrotransposon           | 1312.97    | 43.46       | 1385.35        | 44.1        | 1587.84    | 51.89       |
| Ty1/Copia                 | 112.85     | 3.74        | 135.22         | 4.3         | 147.82     | 4.83        |
| Ty3/Gypsy                 | 679.02     | 22.47       | 638.44         | 20.32       | 832.23     | 27.20       |
| Other                     | 521.11     | 17.25       | 611.70         | 19.47       | 607.79     | 19.86       |
| Non-LTR retrotransposon   | 244.59     | 8.1         | 246.42         | 7.84        | 242.72     | 7.93        |
| LINE                      | 235.02     | 7.78        | 231.98         | 7.38        | 229.00     | 7.48        |
| SINE                      | 9.57       | 0.32        | 14.4           | 0.46        | 13.72      | 0.45        |
| Unclassified retroelement | 127.67     | 4.23        | 133.06         | 4.24        | 126.59     | 4.14        |
| Class II: DNA transposon  | 318.70     | 10.55       | 434.13         | 13.82       | 642.80     | 21.01       |
| TIR                       |            |             |                |             |            |             |
| CMC[DTC]                  | 20.27      | 0.67        | 20.72          | 0.66        | 24.29      | 0.79        |
| hAT                       | 40.87      | 1.35        | 46.73          | 1.49        | 56.52      | 1.85        |
| Mutator                   | 29.55      | 0.98        | 26.74          | 0.85        | 24.97      | 0.82        |
| Tc1/Mariner               | 0.35       | 0.01        | 2.61           | 0.08        | 4.19       | 0.14        |
| PIF/Harbinger             | 22.88      | 0.76        | 25.17          | 0.8         | 55.59      | 1.82        |
| Other                     | 204.44     | 6.77        | 309.56         | 9.85        | 473.04     | 15.46       |
| Helitron                  | 7.05       | 0.23        | 20.15          | 0.64        | 12.51      | 0.41        |
| Tandem repeats            | 182.59     | 6.04        | 170.94         | 5.44        | 124.65     | 4.07        |
| Unknown                   | 60.28      | 2.00        | 74.29          | 2.36        | 88.62      | 2.90        |

Supplementary Table 8. Statistics of intact LTRs identified by LTR\_retriever

| Genome         | Superfamily | TE type | Number of intact LTR | Total  |
|----------------|-------------|---------|----------------------|--------|
| CSA(Yunkang10) | Gypsy       | LTR     | 1,667                | 3,041  |
|                | Copia       | LTR     | 679                  |        |
|                | unknown     | LTR     | 694                  |        |
| CSS(Shuchazao) | Gypsy       | LTR     | 2,131                | 4,718  |
|                | Copia       | LTR     | 1,285                |        |
|                | unknown     | LTR     | 1,301                |        |
| CSS(TGY)       | Gypsy       | LTR     | 8,969                | 20,969 |
|                | Copia       | LTR     | 48,18                |        |
|                | unknown     | LTR     | 7,181                |        |



Supplementary Table 9. Haplotype-resolved chromosomal level assembly and annotation of TGY genome

| ChrID                                          | Haplotype A |                      | Haplotype B |                      |
|------------------------------------------------|-------------|----------------------|-------------|----------------------|
|                                                | Length (Mb) | No. of allelic genes | Length (Mb) | No. of allelic genes |
| Chr1                                           | 261.6       | 3,016                | 277.1       | 2,288                |
| Chr2                                           | 206.2       | 2,578                | 242.9       | 2,051                |
| Chr3                                           | 229.7       | 2,437                | 208.4       | 1,882                |
| Chr4                                           | 244.8       | 2,751                | 221.4       | 1,902                |
| Chr5                                           | 214.0       | 2,332                | 181.1       | 1,721                |
| Chr6                                           | 246.5       | 2,645                | 203.1       | 1,697                |
| Chr7                                           | 260.7       | 2,461                | 198.6       | 1,345                |
| Chr8                                           | 204.1       | 1,890                | 206.9       | 1,513                |
| Chr9                                           | 208.5       | 2,304                | 175.8       | 1,759                |
| Chr10                                          | 188.4       | 1,908                | 187.1       | 1,496                |
| Chr11                                          | 137.1       | 1,500                | 155.5       | 1,477                |
| Chr12                                          | 169.2       | 1,707                | 173.9       | 1,353                |
| Chr13                                          | 169.5       | 1,796                | 181.5       | 1,410                |
| Chr14                                          | 177.2       | 1,847                | 179.3       | 1,598                |
| Chr15                                          | 140.2       | 1,424                | 125.0       | 1,231                |
| Total No. of contigs                           |             |                      | 60345       |                      |
| Total length of contigs (Mb)                   |             |                      | 5987        |                      |
| Total No. of anchored contigs                  |             |                      | 45045       |                      |
| Total length of chromosome level assembly (Mb) |             |                      | 5975        |                      |
| Anchor rate (%)                                |             |                      | 99.72       |                      |

Supplementary Table 10. Statistics of genetic variation between the two haplotypes in the 'TGY' genome

| ChrID | No. of SNPs | No. of insertions | No. of deletions | ChrID | No. of SNPs | No. of insertions | No. of deletions |
|-------|-------------|-------------------|------------------|-------|-------------|-------------------|------------------|
| Chr01 | 346833      | 10441             | 10469            | Chr09 | 241192      | 7017              | 7214             |
| Chr02 | 281413      | 8606              | 8664             | Chr10 | 238299      | 8618              | 8460             |
| Chr03 | 251611      | 7521              | 7434             | Chr11 | 166717      | 5403              | 5291             |
| Chr04 | 274057      | 8753              | 8858             | Chr12 | 251451      | 8209              | 8388             |
| Chr05 | 324626      | 9722              | 9894             | Chr13 | 184866      | 7449              | 7061             |
| Chr06 | 246867      | 7582              | 7447             | Chr14 | 335139      | 11419             | 11227            |
| Chr07 | 174122      | 6194              | 6075             | Chr15 | 185904      | 5829              | 5879             |
| Chr08 | 195662      | 5937              | 5974             | Total | 3698759     | 118700            | 118335           |

Supplementary Table 11. TE annotation between the two haplotypes in the 'Tieguanyin' genome

|                           | Haplotype A |             | Haplotype B |             |
|---------------------------|-------------|-------------|-------------|-------------|
|                           | Length(Mb)  | % of genome | Length(Mb)  | % of genome |
| Total repeat fraction     | 2,269.42    | 74.28       | 2,162.81    | 74.19       |
| Class I: Retroelement     | 1,890.03    | 61.86       | 1,804.57    | 61.90       |
| LTR Retrotransposon       | 1,491.40    | 48.81       | 1,421.48    | 48.76       |
| Ty1/Copia                 | 118.79      | 3.89        | 114.16      | 3.92        |
| Ty3/Gypsy                 | 778.51      | 25.48       | 744.83      | 25.55       |
| Other                     | 594.10      | 19.44       | 562.50      | 19.29       |
| Non-LTR retrotransposon   | 257.33      | 8.42        | 248.11      | 8.51        |
| LINE                      | 243.14      | 7.96        | 234.44      | 8.04        |
| SINE                      | 14.19       | 0.46        | 13.67       | 0.47        |
| Unclassified retroelement | 141.30      | 4.62        | 134.98      | 4.63        |
| Class II: DNA transposon  | 415.44      | 13.60       | 394.95      | 13.55       |
| TIR                       |             |             |             |             |
| CMC[DTC]                  | 9.26        | 0.30        | 9.26        | 0.32        |
| hAT                       | 10.67       | 0.35        | 9.98        | 0.34        |
| Mutator                   | 54.67       | 1.79        | 52.30       | 1.79        |
| Tc1/Mariner               |             |             |             |             |
| PIF/Harbinger             | 3.64        | 0.12        | 3.28        | 0.11        |
| Other                     | 337.20      | 11.04       | 320.13      | 10.98       |
| Helitron                  | 15.41       | 0.50        | 14.97       | 0.51        |
| Tandem repeats            | 61.52       | 2.01        | 56.15       | 1.93        |
| Unknown                   | 96.83       | 3.17        | 92.14       | 3.16        |

Supplementary Table 12. Number of genes showing biased expression toward haplotype A (i.e., A>B) or haplotype B (A<B).

|       | Stem |     | Bud |     | Root |     | Flower |     | Young leaf |     | Mature leaf |     |
|-------|------|-----|-----|-----|------|-----|--------|-----|------------|-----|-------------|-----|
|       | A>B  | A<B | A>B | A<B | A>B  | A<B | A>B    | A<B | A>B        | A<B | A>B         | A<B |
| Chr01 | 208  | 221 | 192 | 213 | 187  | 207 | 160    | 198 | 216        | 214 | 191         | 197 |
| Chr02 | 211  | 155 | 209 | 153 | 194  | 148 | 197    | 180 | 207        | 149 | 185         | 131 |
| Chr03 | 153  | 160 | 138 | 162 | 133  | 153 | 119    | 174 | 158        | 156 | 143         | 136 |
| Chr04 | 176  | 170 | 177 | 163 | 152  | 159 | 182    | 130 | 176        | 177 | 152         | 150 |
| Chr05 | 149  | 143 | 139 | 137 | 142  | 137 | 158    | 116 | 142        | 144 | 135         | 126 |
| Chr06 | 150  | 180 | 135 | 184 | 144  | 182 | 76     | 231 | 147        | 190 | 139         | 174 |
| Chr07 | 123  | 116 | 116 | 121 | 105  | 122 | 102    | 86  | 125        | 121 | 112         | 121 |
| Chr08 | 133  | 122 | 128 | 112 | 132  | 101 | 107    | 104 | 131        | 124 | 123         | 108 |
| Chr09 | 222  | 141 | 224 | 128 | 232  | 133 | 195    | 127 | 221        | 136 | 205         | 128 |
| Chr10 | 122  | 136 | 122 | 114 | 115  | 131 | 104    | 121 | 115        | 135 | 108         | 129 |
| Chr11 | 97   | 139 | 80  | 126 | 84   | 126 | 78     | 140 | 88         | 140 | 87          | 129 |
| Chr12 | 185  | 104 | 181 | 97  | 180  | 95  | 94     | 95  | 185        | 105 | 165         | 96  |
| Chr13 | 124  | 108 | 116 | 108 | 116  | 108 | 100    | 125 | 124        | 106 | 110         | 98  |
| Chr14 | 122  | 144 | 123 | 144 | 105  | 146 | 114    | 120 | 119        | 156 | 111         | 148 |
| Chr15 | 108  | 113 | 88  | 107 | 75   | 108 | 40     | 155 | 101        | 114 | 94          | 103 |

\* Designation of A and B between different chromosomes are arbitrary.

Supplementary Table 13. KEGG analysis of 386 inconsistent allele specifically expressed genes. P values were calculated using two-sided Fisher's exact test and further corrected based on Benjamini-Hochberg false discovery rate correction method.

| #  | Pathway                                               | Candidate genes with pathway annotation (82) | All genes with pathway annotation (8052) | Pvalue   | Qvalue   | Pathway ID |
|----|-------------------------------------------------------|----------------------------------------------|------------------------------------------|----------|----------|------------|
| 1  | Glutathione metabolism                                | 5 (6.1%)                                     | 161 (2%)                                 | 0.023865 | 0.705718 | ko00480    |
| 2  | alpha-Linolenic acid metabolism                       | 3 (3.66%)                                    | 61 (0.76%)                               | 0.023995 | 0.705718 | ko00592    |
| 3  | Flavone and flavonol biosynthesis                     | 1 (1.22%)                                    | 3 (0.04%)                                | 0.030245 | 0.705718 | ko00944    |
| 4  | Terpenoid backbone biosynthesis                       | 3 (3.66%)                                    | 81 (1.01%)                               | 0.049282 | 0.720923 | ko00900    |
| 5  | Flavonoid biosynthesis                                | 3 (3.66%)                                    | 85 (1.06%)                               | 0.055447 | 0.720923 | ko00941    |
| 6  | Glycosphingolipid biosynthesis - ganglio series       | 1 (1.22%)                                    | 7 (0.09%)                                | 0.06917  | 0.720923 | ko00604    |
| 7  | Phenylpropanoid biosynthesis                          | 5 (6.1%)                                     | 219 (2.72%)                              | 0.072092 | 0.720923 | ko00940    |
| 8  | Stilbenoid, diarylheptanoid and gingerol biosynthesis | 2 (2.44%)                                    | 52 (0.65%)                               | 0.098051 | 0.765292 | ko00945    |
| 9  | Ether lipid metabolism                                | 2 (2.44%)                                    | 54 (0.67%)                               | 0.104473 | 0.765292 | ko00565    |
| 10 | Synthesis and degradation of ketone bodies            | 1 (1.22%)                                    | 12 (0.15%)                               | 0.115663 | 0.765292 | ko00072    |

Supplementary Table 15. Summary of the variants in different clustered groups of tea populations.

| Type | Subgroups | Number of re-sequenced accessions | Ratio of non-synonymous to synonymous SNPs | $\pi$                 |
|------|-----------|-----------------------------------|--------------------------------------------|-----------------------|
| CT   | CT        | 15                                | 1.49                                       | $1.56 \times 10^{-4}$ |
| CSA  | ACSA      | 18                                | 1.47                                       | $5.67 \times 10^{-4}$ |
|      | CCSA      | 29                                | 1.47                                       | $6.44 \times 10^{-4}$ |
|      | SSJ       | 20                                | 1.48                                       | $5.33 \times 10^{-4}$ |
| CSS  | SFJ       | 40                                | 1.49                                       | $5.91 \times 10^{-4}$ |
|      | ZJNFJ     | 35                                | 1.48                                       | $6.25 \times 10^{-4}$ |
|      | HHA       | 19                                | 1.48                                       | $7.38 \times 10^{-4}$ |

Supplementary Table 16. LD decay in each of the geographic groups

| Group | SNP Group |                    |                 |
|-------|-----------|--------------------|-----------------|
|       | $r^2$     | Half distance (bp) | Number of Pairs |
| CT    | 0.342     | 5,600              | 24,114          |
| ACSA  | 0.214     | 700                | 3,223,295       |
| CCSA  | 0.202     | 1,200              | 4,982,059       |
| HHA   | 0.184     | 1,600              | 3,304,603       |
| SFJ   | 0.172     | 700                | 6,419,076       |
| SSJ   | 0.190     | 3,300              | 4,204,654       |
| ZJNFJ | 0.174     | 800                | 6039,878        |

Supplementary Table 17. Fixation index (Fst) among different groups of tea populations

| Population | CT       | ACSA     | CCSA     | SSJ      | SFJ      | ZJNFJ    | HHA |
|------------|----------|----------|----------|----------|----------|----------|-----|
| CT         | 0        |          |          |          |          |          |     |
| ACSA       | 0.244477 | 0        |          |          |          |          |     |
| CCSA       | 0.226413 | 0.087722 | 0        |          |          |          |     |
| SSJ        | 0.239998 | 0.152777 | 0.131797 | 0        |          |          |     |
| SFJ        | 0.233661 | 0.159139 | 0.149505 | 0.051333 | 0        |          |     |
| ZJNFJ      | 0.234969 | 0.162701 | 0.148436 | 0.028807 | 0.026164 | 0        |     |
| HHA        | 0.258015 | 0.164747 | 0.164747 | 0.028219 | 0.058015 | 0.028219 | 0   |



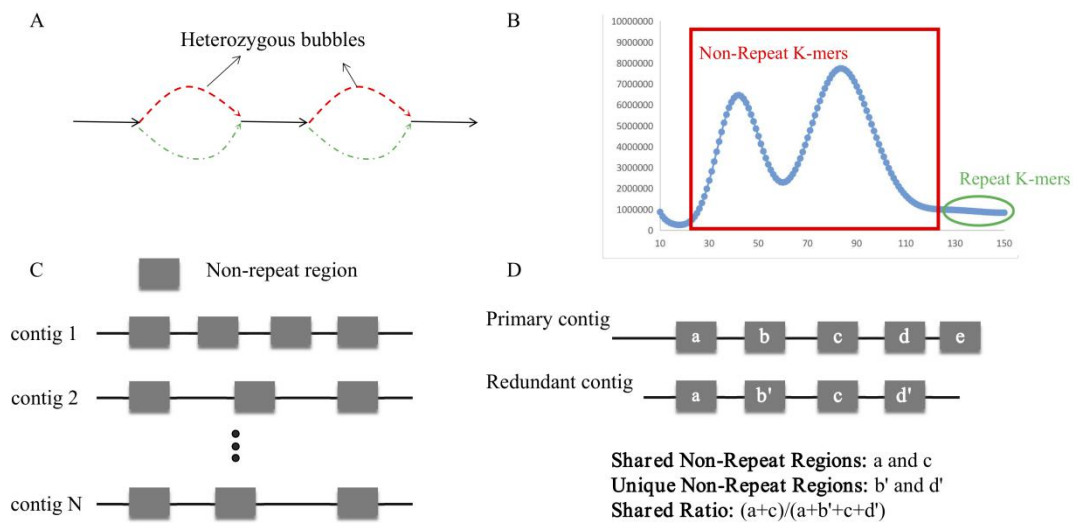

Supplementary Fig. 1. Illustration of Khaper algorithm for haplotype phasing. (A) Assembly of a highly heterozygous genome usually leads to bubbles, which represent phased contigs, due to high level of sequence variations. The black solid-line arrows represent haplotype-fused sequences, and the red and green dash-line arrows are haplotype resolved assembly. (B) K-mer distribution of a highly heterozygous diploid genome. Non-repeat K-mers highlighted in the red square and repeat K-mers in the green oval are identified using a cutoff of  $1.5 \times$  depth of the main peak. (C) Non-repeat regions are identified for each contig based on non-repeat K-mers. (D) Primary contigs and redundant sequences can be identified with pairwise comparison between contigs if they share a large proportion of Non-Repeat regions

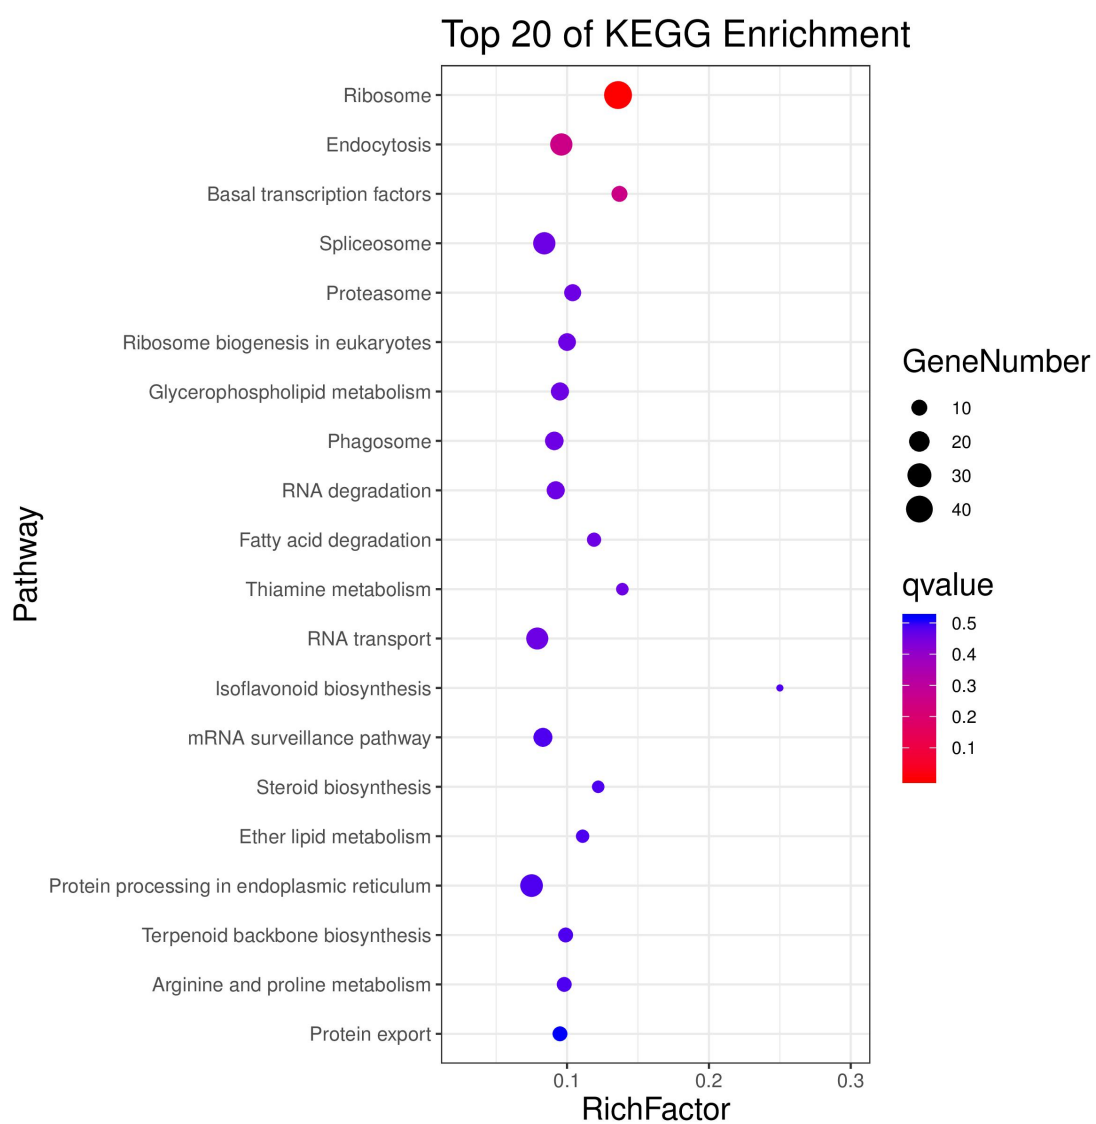

Supplementary Fig. 2. KEGG enrichment analysis of the genes with consistent ASE pattern.

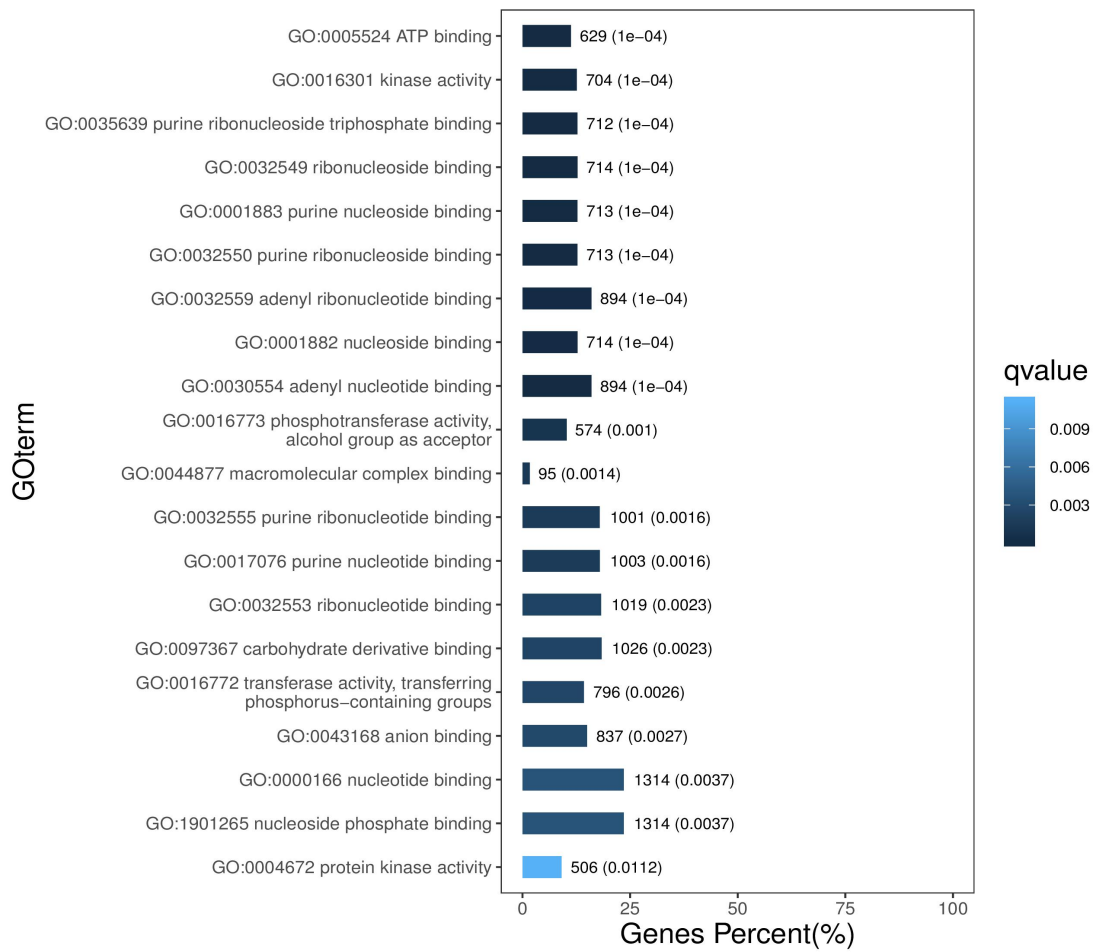

Supplementary Fig. 3. GO enrichment analysis of genes with large-effect variations

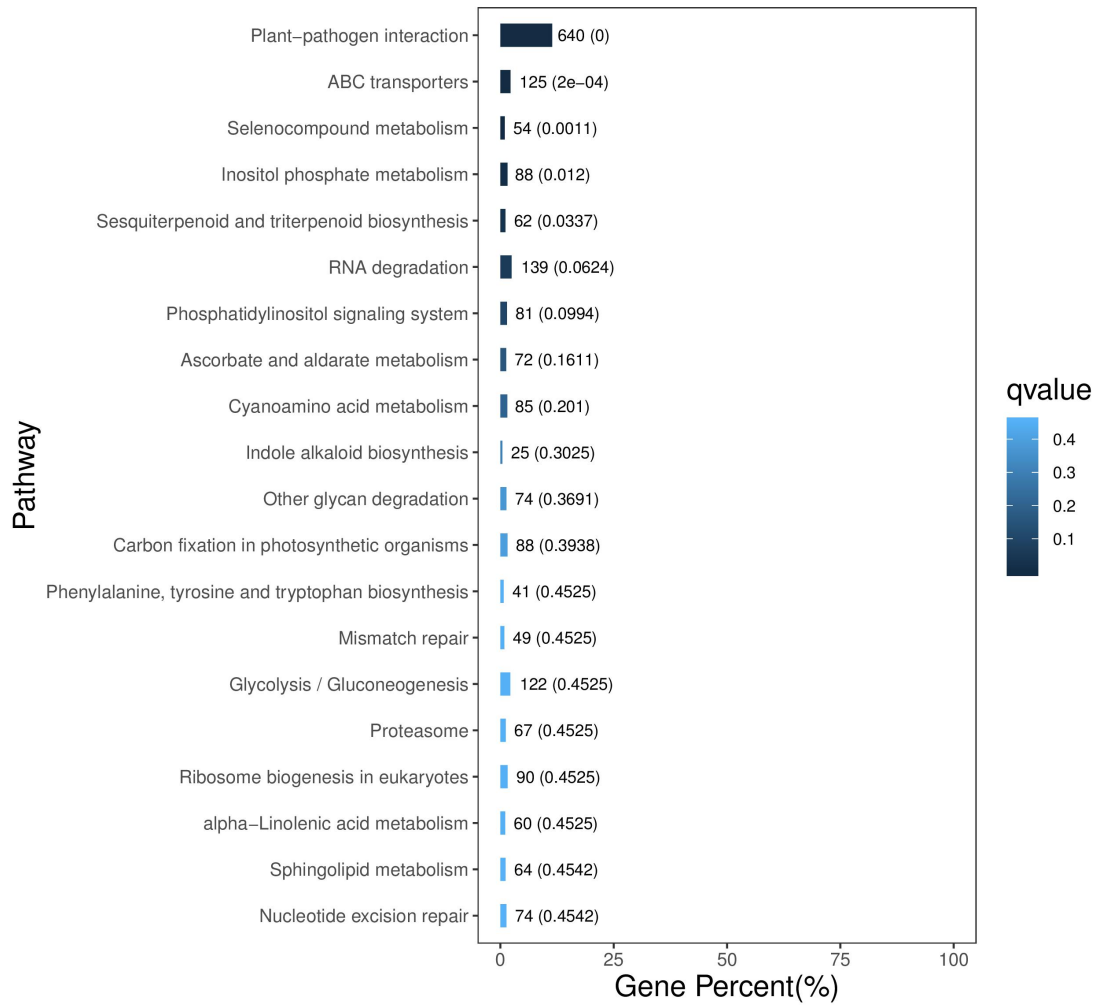

Supplementary Fig. 4. KEGG pathway enrichment analysis of genes with large-effect variation

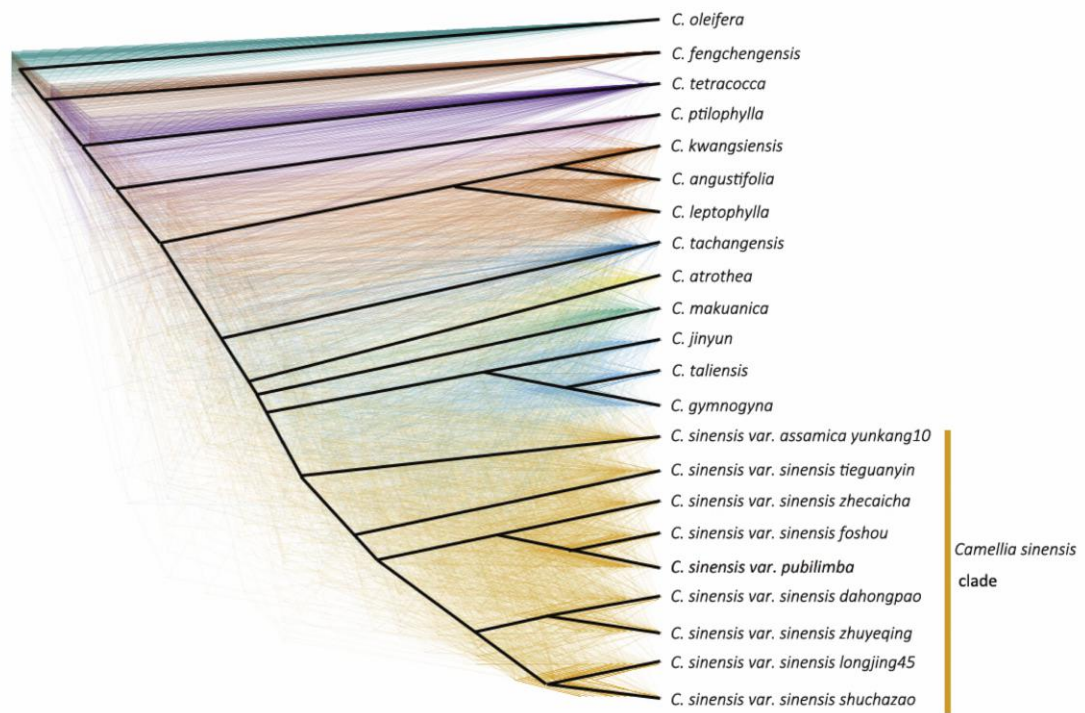

Supplementary Fig. 5. Densitree showing the discordance between 500 sampled gene trees and the species tree constructed using ASTRAL-III.

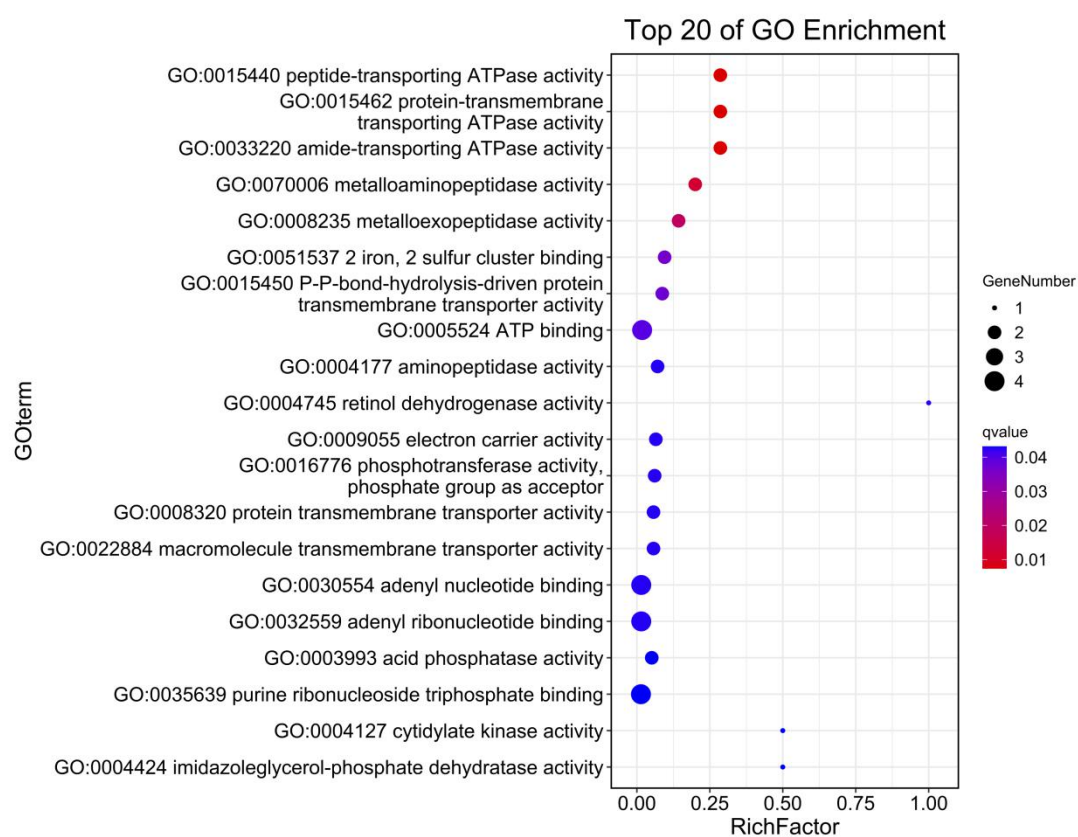

Supplementary Fig. 6. GO enrichment analysis of 98 introgressed genes that are shared in the six cultivated tea populations.

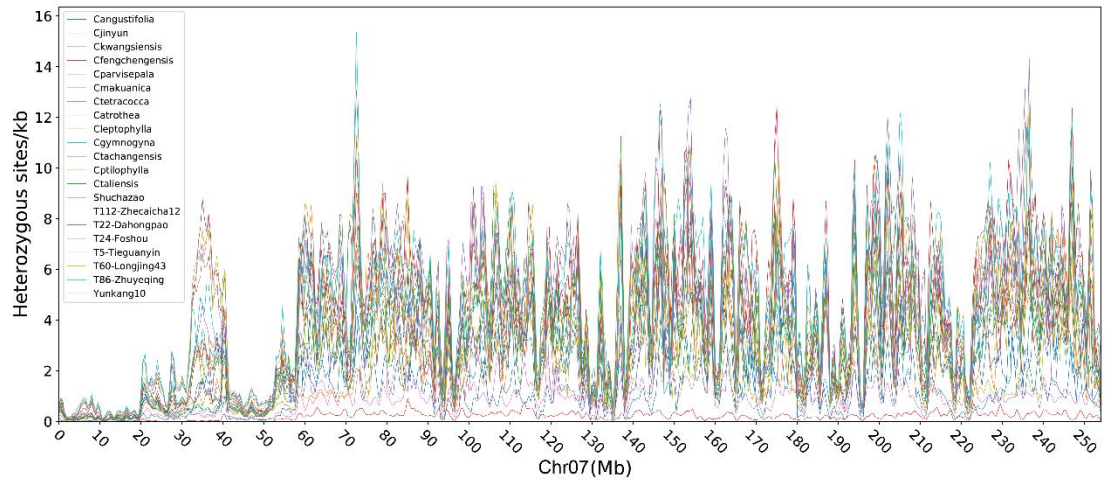

Supplementary Fig. 7. Distribution of heterozygous sites (per kb) of 21 resequenced individuals along chromosome 07, including 12 close relatives, seven var. *sinensis* and one var. *assamica*.

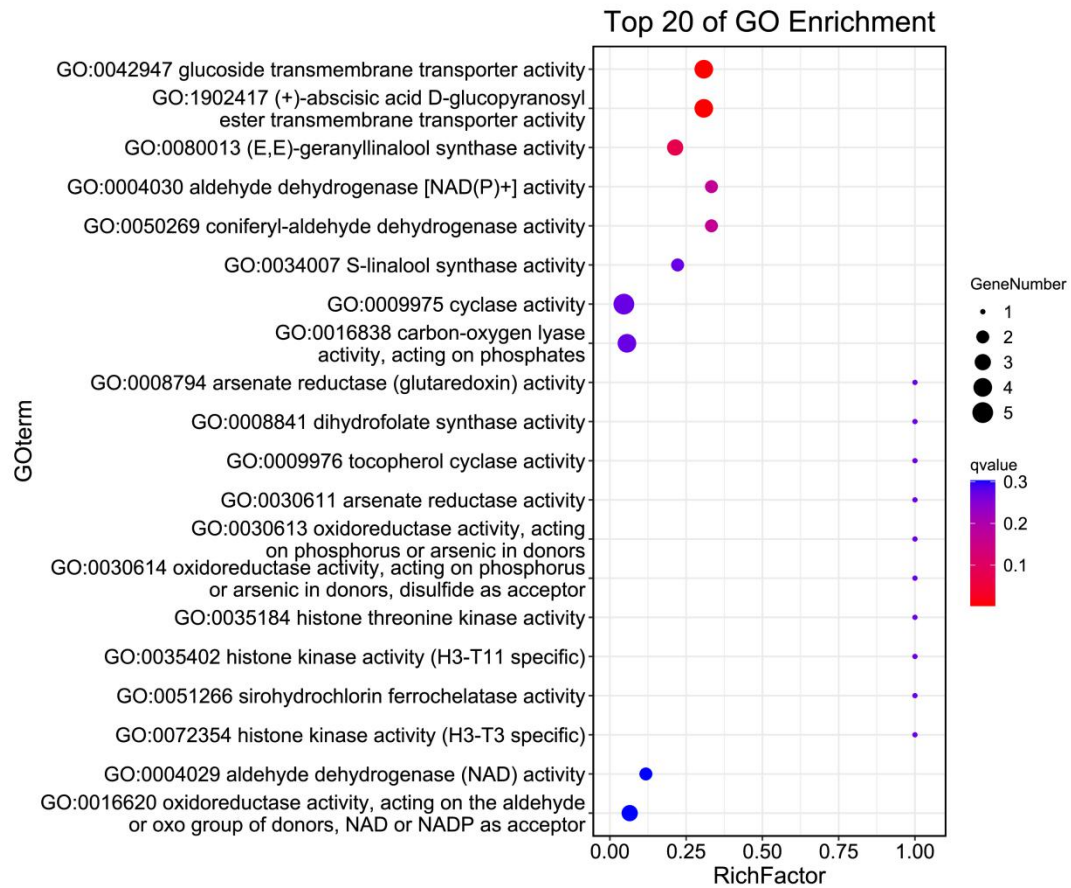

Supplementary Fig. 8. GO enrichment of artificially selected protein-coding genes in the early domestication process of CSA landraces.



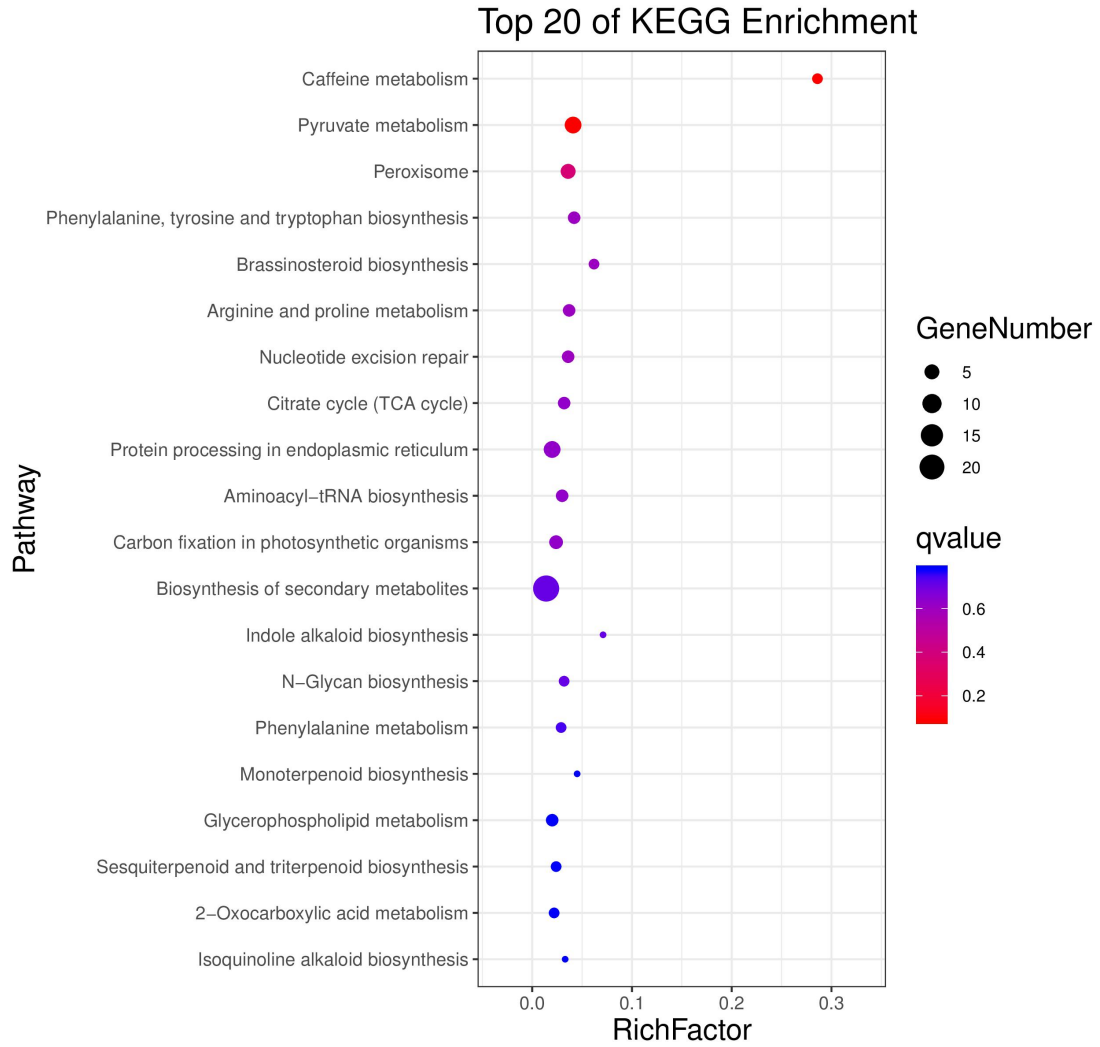

Supplementary Fig. 9. Top 20 pathways based on the KEGG enrichment analysis of artificially selected genes in the improvement of CSA elite cultivars.

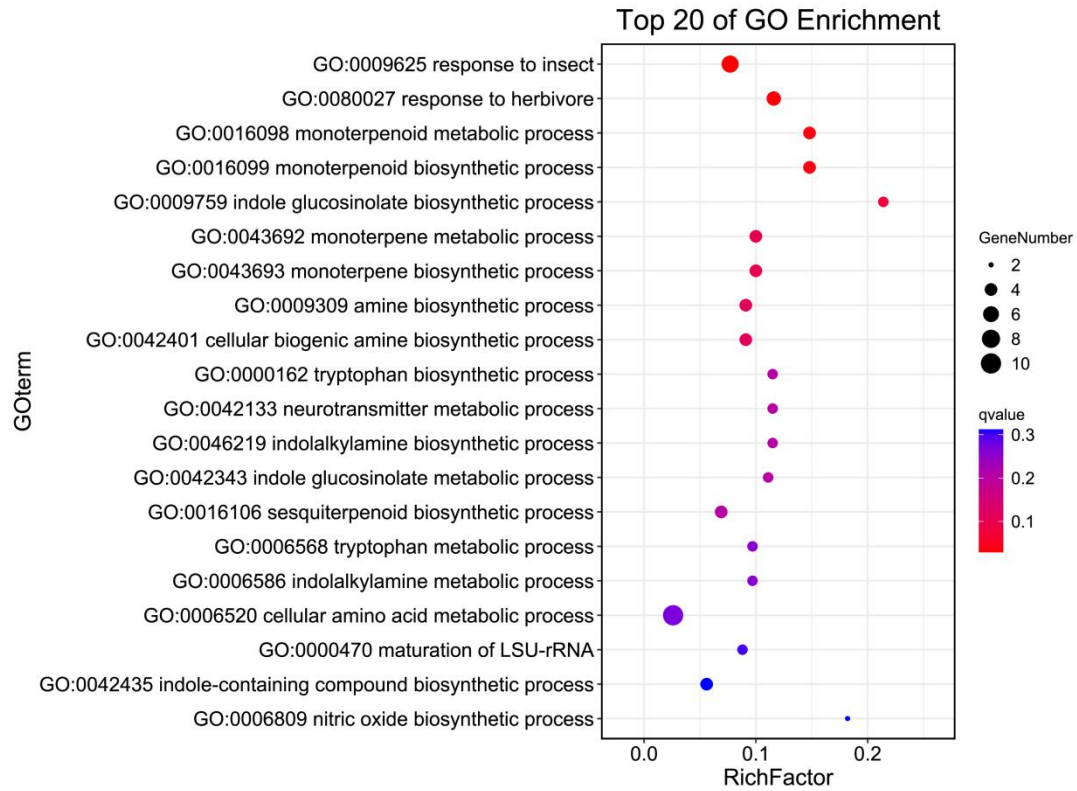

Supplementary Fig. 10. GO enrichment (Biological Process) of artificially selected protein-coding genes in the early domestication process of CSS landraces .

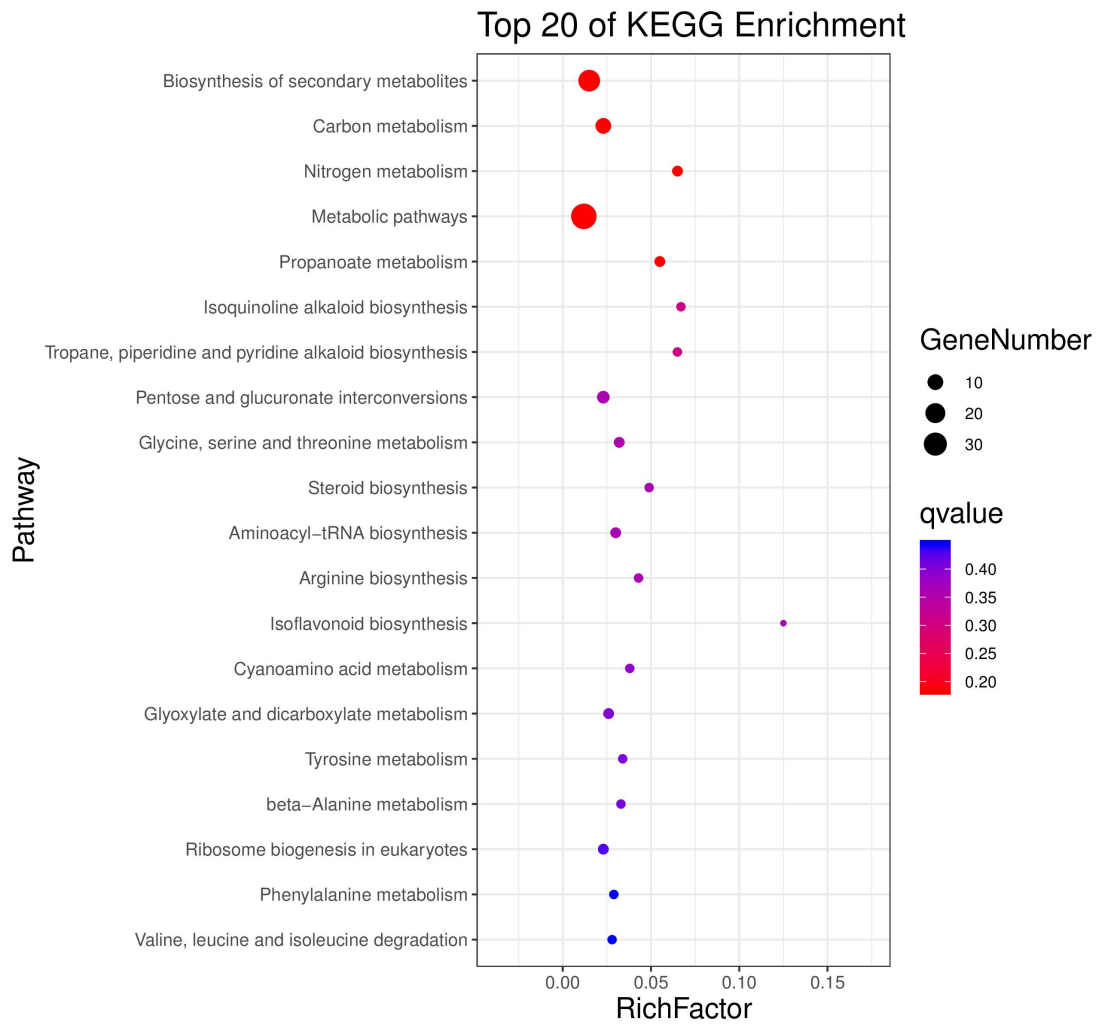

Supplementary Fig. 11. Top 20 pathways based on the KEGG enrichment analysis of artificially selected genes in the early domestication of CSS landraces.

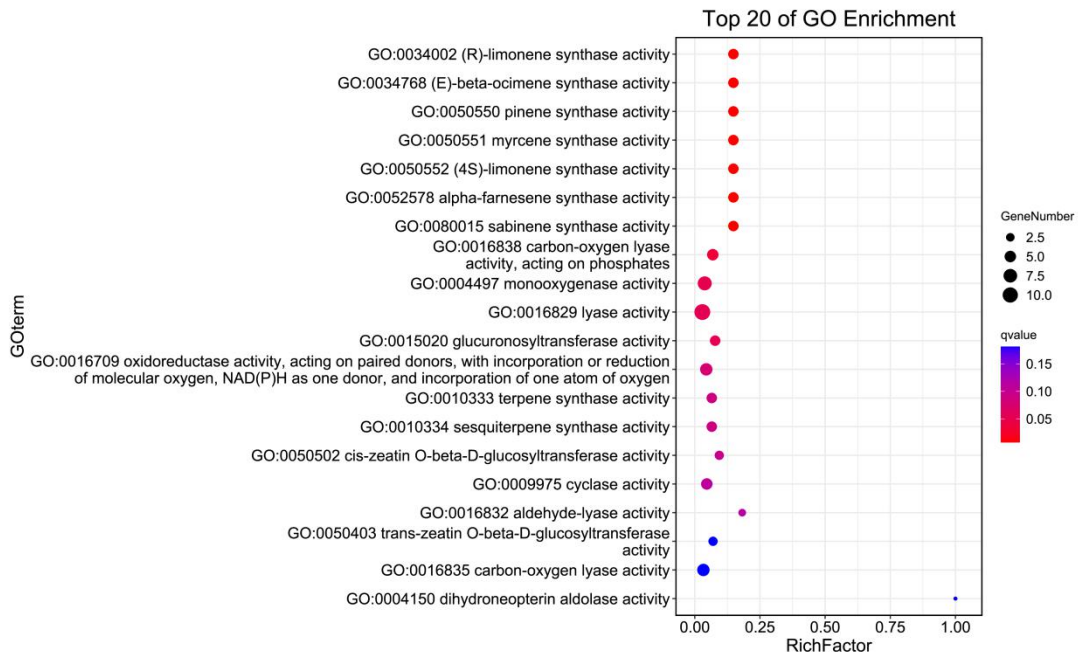

Supplementary Fig. 12. GO enrichment (Molecular Function) of artificially selected protein-coding genes in the early domestication process of CSS landraces .

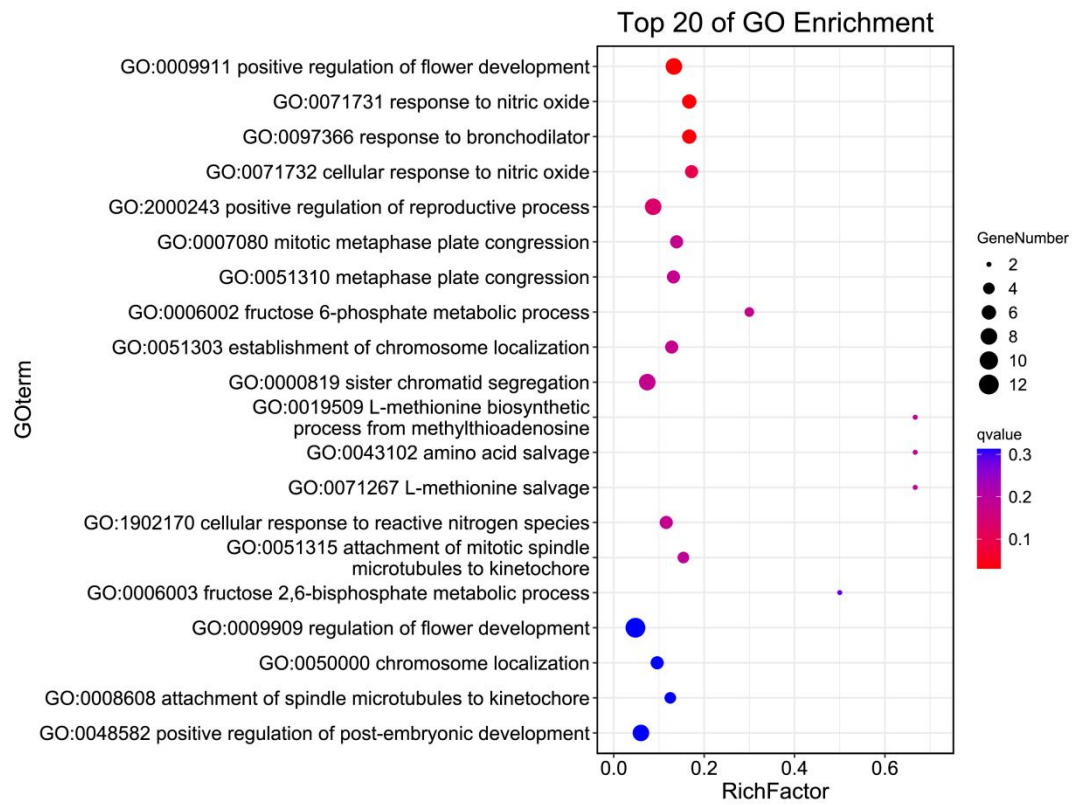

Supplementary Fig. 13. GO enrichment (Biological Process) of artificially selected protein-coding genes in the improvement process of CSS elite.
